# Supplementary material for: Effects of dietary polyphenols on maternal and fetal outcomes in maternal diabetes
Source: Royal Society of Chemistry journal article supplement (doi:10.1039/d3fo02048g), 2023-01-01
Supplement: d3fo02048g1.pdf [file d3fo02048g1.pdf]

**Supplementary Table 1. Experimental data of polyphenols in improving maternal and fetal outcomes of diabetes during pregnancy.**

| <b>Experimental model</b>                                                | <b>Polyphenol consumption</b>               | <b>Intervention period</b>                    | <b>Maternal function and outcomes</b>                                                                                                                                                                                                               | <b>Embryonic, fetal function and outcomes</b>     | <b>Potential mechanisms</b>                                                  | <b>Reference</b> |
|--------------------------------------------------------------------------|---------------------------------------------|-----------------------------------------------|-----------------------------------------------------------------------------------------------------------------------------------------------------------------------------------------------------------------------------------------------------|---------------------------------------------------|------------------------------------------------------------------------------|------------------|
| Human placenta, omental and subcutaneous adipose tissue (GDM-like model) | Resveratrol (200 $\mu$ M)                   | 20 hours                                      | $\downarrow$ inflammation; $\downarrow$ insulin resistance                                                                                                                                                                                          | NA                                                | NA                                                                           | [1]              |
| STZ-induced rat GDM model                                                | Resveratrol (60, 120, and 240 mg/kg)        | 2 weeks (1 time/day) from 8 days of pregnancy | $\uparrow$ insulin secretion; $\downarrow$ blood glucose; $\downarrow$ body weight; $\downarrow$ blood lipids; adipocytokines ( $\downarrow$ leptin, $\uparrow$ adiponectin, $\downarrow$ resistin, $\downarrow$ TNF- $\alpha$ , $\downarrow$ IL-6) | NA                                                | NA                                                                           | [2]              |
| db/+ mouse GDM model                                                     | Resveratrol (10 mg/kg/day) by orally gavage | 4 weeks before pregnancy and during pregnancy | $\downarrow$ hyperglycemia; $\downarrow$ insulin resistance                                                                                                                                                                                         | $\uparrow$ litter size; $\downarrow$ birth weight | $\uparrow$ AMPK signaling pathway ( $\uparrow$ p-AMPK, $\downarrow$ p-HDAC4, | [3]              |

---

↓G6Pase)

---

|                                  |                                                                                                    |                  |                                                   |    |                      |     |
|----------------------------------|----------------------------------------------------------------------------------------------------|------------------|---------------------------------------------------|----|----------------------|-----|
| HFD diet-induced mouse GDM model | Resveratrol (mixed with the powdered HFD diet to a concentration of 0.2 %) by dietary intervention | From GD0 to GD18 | ↓bodyweight; ↓blood glucose; ↓insulin intolerance | NA | ↑miR-23a-3p/NOV axis | [4] |
|----------------------------------|----------------------------------------------------------------------------------------------------|------------------|---------------------------------------------------|----|----------------------|-----|

---

|                           |                                                                                                                             |                          |                                                                                                                   |    |    |     |
|---------------------------|-----------------------------------------------------------------------------------------------------------------------------|--------------------------|-------------------------------------------------------------------------------------------------------------------|----|----|-----|
| STZ-induced rat GDM model | Resveratrol-zinc oxide complex encapsulated with chitosan (CS-ZnO-RS) (50, 100, and 200 mg/kg body weight) by orally gavage | 30, 60, 90 and 120 hours | ↓blood glucose; ↑antioxidant activities; ↓inflammatory activity; ↓endoplasmic reticulum stress; ↓hepatic fibrosis | NA | NA | [5] |
|---------------------------|-----------------------------------------------------------------------------------------------------------------------------|--------------------------|-------------------------------------------------------------------------------------------------------------------|----|----|-----|

---

|                                               |                                                    |                                  |                                                                      |                                                                                                         |                                                                                             |     |
|-----------------------------------------------|----------------------------------------------------|----------------------------------|----------------------------------------------------------------------|---------------------------------------------------------------------------------------------------------|---------------------------------------------------------------------------------------------|-----|
|                                               |                                                    |                                  |                                                                      | ↓embryonic maldevelopment;<br>↓apoptosis; ↓caspases activation; ↓oxidative stress; ↑antioxidant status; |                                                                                             |     |
| STZ-induced rat model of diabetic embryopathy | Resveratrol (100 mg/kg b. wt.) via gavage feeding  | For 10 days (from day E3 to E12) | ↑blood glucose; ↑serum lipid profile; ↑outcome of diabetic pregnancy | ↓embryonic development delay                                                                            | NA                                                                                          | [6] |
|                                               |                                                    |                                  |                                                                      |                                                                                                         | ↑RAR and RXR;<br>↑RAR and RXR DNA-binding activity; ↑ERK1/2, JNK1/2 and p38 phosphorylation |     |
| STZ-induced rat model of diabetic embryopathy | Resveratrol (100 mg/kg) via gavage feeding         | For 10 days (from day E3 to E12) | NA                                                                   | ↑neuronal marker proteins (GAP-43, total tau, and neurofilament B)                                      |                                                                                             | [7] |
| STZ-induced rat model of diabetic embryopathy | Resveratrol (100 mg/kg/day) by oral administration | From day E8 to E12               | ↓serum glucose                                                       | ↓teratogenic effect;<br>↓oxidative stress                                                               | NA                                                                                          | [8] |

|                  |                      |                 |                                |                                |                   |      |
|------------------|----------------------|-----------------|--------------------------------|--------------------------------|-------------------|------|
|                  |                      | From incubation |                                |                                |                   |      |
| Fertilized eggs  |                      | to embryo       |                                | ↓developmental damage;         |                   |      |
| cultured in high |                      | development day |                                | ↓vascular injury; ↓oxidative   |                   |      |
| glucose (HG; 0.4 | Resveratrol (0.1, 1, | (EDD) 3.5 or    |                                | stress; cell cycle (↓p21,      |                   |      |
| mmol/egg)        | and 10 nmol/egg)     | EDD5            | NA                             | ↑cyclin D1)                    | ↑Pax3             | [9]  |
|                  |                      |                 |                                | ↑AMPK signaling                |                   |      |
| db/+ mouse GDM   | Curcumin (50 and     |                 |                                |                                | pathway (↑p-AMPK, |      |
| model            | 100 mg/kg/day) by    | From GD0 to     | ↓glucose and insulin           |                                | ↓p-HDAC4,         |      |
|                  | orally gavage        | GD20            | intolerance; ↓oxidative stress | ↑litter size; ↓birth weight    | ↓G6Pase)          | [10] |
|                  |                      |                 |                                | ↑AMPK signaling                |                   |      |
| Whole-embryo     |                      |                 |                                |                                |                   |      |
| culture of mouse |                      |                 |                                | ↓NTD rate; ↓oxidative          |                   |      |
| embryo in high   |                      |                 |                                | stress, nitrosative stress and |                   |      |
| glucose (HG; 300 | Curcumin (0, 10      |                 |                                | ER stress; ↓caspase            |                   |      |
| mg/dL)           | and 20 μM)           | 24 or 36 hours  | NA                             | activation                     | NA                | [11] |

|                                                                      |                                             |                                               |                                                                                        |                              |                                                                                     |                  |      |
|----------------------------------------------------------------------|---------------------------------------------|-----------------------------------------------|----------------------------------------------------------------------------------------|------------------------------|-------------------------------------------------------------------------------------|------------------|------|
| Whole-embryo culture of mouse embryo in high glucose (HG; 300 mg/dL) | Punicalagin (0, 10 and 20 $\mu$ mol/L)      | 24 or 36 hours                                | NA                                                                                     | NA                           | ↓NTD rate; ↓oxidative stress, nitrosative stress and ER stress; ↓caspase activation | NA               | [12] |
| db/+ mouse GDM model                                                 | Oleuropein (5 or 10 mg/kg/day) by i.p.      | From GD0 to GD20                              | ↓blood glucose; ↓insulin and hepatic glycogen levels; ↓oxidative stress; ↓inflammation | ↓birth weight; ↑litter size  | ↑AMPK signaling pathway (↑p-AMPK, ↓p-HDAC4, ↓G6Pase)                                |                  | [13] |
| db/+ mouse GDM model                                                 | Naringenin (50 mg/kg)                       | From GD0 to GD20                              | ↑insulin response; ↑glucose metabolism                                                 | ↑litter size; ↓litter weight | NA                                                                                  |                  | [14] |
| db/+ mouse GDM model                                                 | Naringenin (100 mg/kg/day) by orally gavage | 4 weeks before pregnancy and during pregnancy | ↓bodyweight; ↓blood glucose; ↑glucose and insulin tolerance; ↓inflammation             | ↓birth weight; ↑litter size  |                                                                                     |                  |      |
| C2C12 mouse myoblasts (insulin                                       | Naringenin (50 $\mu$ g/mL)                  | 36 hours                                      | ↓ROS; ↑GLUT4 membrane translocation; ↑glucose uptake                                   | NA                           |                                                                                     | ↑AMPK activation | [15] |

---

resistance model)

---

Human placenta

trophoblast HTR-

8/SVneo cell and

HUVEC cultured

in medium with

Naringenin

insulin (1 ng/mL)

(50 µg/mL)

48 hours

NA

NA

↓miR-140-3p,

↑insulin resistance

signaling

[16]

---

Human placenta,

VAT, and skeletal

muscle (GDM-like

Naringenin (400

environment)

µM)

20 hours

↑glucose uptake;

↓inflammation; ↑antioxidant

activity

---

db/+ mouse GDM

Naringenin (50

model

mg/kg/day) by i.p.

From GD10 to

GD17

↑antioxidant expression;

↑anti-Inflammatory

NA

↑IκB-α, ↓NF-κB

pathway

[17]

---

STZ-induced rat

Quercetin (75

GDM model

mg/kg) by orally

On days 0, 7, 14,

and 20 of the

↓number of glycogen cells;

↓histological abnormalities of

NA

NA

[18]

---

|                                                 |                                              |                           |                                                                                                                |                                                                    |                                          |      |
|-------------------------------------------------|----------------------------------------------|---------------------------|----------------------------------------------------------------------------------------------------------------|--------------------------------------------------------------------|------------------------------------------|------|
|                                                 | gavage                                       | gestation                 | placenta; ↑adiponectin;<br>↓adiponectin receptors<br>(AdipoR1 and AdipoR2)                                     |                                                                    |                                          |      |
| HFD diet-induced mouse GDM model                | Quercetin (700 mg/d) by dietary intervention | 1 month before pregnancy  | ↓placental necrosis, inflammation, or hemorrhage;<br>↓labyrinthine placental vasculopathy; ↓lipid peroxidation | NA                                                                 | NA                                       | [19] |
| STZ-induced mouse GDM model                     | Quercetin (30 mg/kg/day) by orally gavage    | 4 weeks before conception | ↓blood glucose; ↑17β-estradiol; ↑Igf1r, integrin αvβ3, Cox2 genes; ↓Caspase-3 gene; ↓inactive β-catenin        | ↑development of preimplantation embryo                             | ↑nuclear Wnt-β-catenin signaling pathway | [20] |
| STZ-induced mouse model of diabetic embryopathy | Quercetin (100 mg/kg/day) via gavage feeding | From E7.5 to E10.5        | NA                                                                                                             | ↓NTD rate; ↓apoptosis;<br>↓nitrosative stress and oxidative stress | NA                                       | [21] |

|                                                                        |                                                       |                                  |                                                              |                                                                                             |                                                             |      |
|------------------------------------------------------------------------|-------------------------------------------------------|----------------------------------|--------------------------------------------------------------|---------------------------------------------------------------------------------------------|-------------------------------------------------------------|------|
| Mouse embryonic neural stem cells cultured in high glucose (HG; 33 mM) | Q3M (2, 5, 10 and 20 $\mu$ M)                         | 24 hours                         | NA                                                           | $\downarrow$ ROS                                                                            |                                                             |      |
| STZ-induced mouse model of diabetic embryopathy                        | Q3G (100 mg/kg) via gavage feeding                    | From E6.5 to E9.5                | NA                                                           | $\downarrow$ NTD rate; $\downarrow$ apoptosis; $\downarrow$ intracellular stress conditions | $\downarrow$ NF- $\kappa$ B transcription regulation system | [22] |
| Human placenta, VAT and skeletal muscle (GDM-like model)               | Nobiletin (100 or 200 $\mu$ M)                        | Overnight or 3 h                 | $\uparrow$ glucose uptake; $\downarrow$ inflammation         |                                                                                             |                                                             |      |
| db/+ mouse GDM model                                                   | Nobiletin (daily doses of 50 mg/kg) by oral gavage or | From GD1 to GD17 or GD10 to GD17 | $\uparrow$ fasting glucose levels; $\downarrow$ inflammation | NA                                                                                          | $\downarrow$ NF- $\kappa$ B, Akt or MAPK ERK1/2 activation  | [23] |



|                   |                        |          |                                                   |    |                                         |      |
|-------------------|------------------------|----------|---------------------------------------------------|----|-----------------------------------------|------|
| i.p.              |                        |          |                                                   |    |                                         |      |
| Human placentae,  |                        |          |                                                   |    |                                         |      |
| primary amnion    |                        |          |                                                   |    |                                         |      |
| cell and primary  | Apigenin (20 $\mu$ M); |          |                                                   |    |                                         |      |
| myometrium cells  | Curcumin (60 $\mu$ M); |          |                                                   |    |                                         |      |
| (inflammation     | Naringenin (400        |          |                                                   |    | $\downarrow$ NF- $\kappa$ B p65 binding |      |
| model)            | $\mu$ M)               | 24 hours | $\downarrow$ pro-labour mediators                 | NA | activity                                | [24] |
| Human amnion,     |                        |          |                                                   |    |                                         |      |
| choriodecidua and |                        |          |                                                   |    |                                         |      |
| myometrium        |                        |          |                                                   |    |                                         |      |
| (inflammation     |                        |          | $\downarrow$ pro-inflammatory and pro-            |    | $\downarrow$ NF- $\kappa$ B RelA        |      |
| model)            | Honokiol (100 $\mu$ M) | 21 hours | labour mediators                                  | NA | transcriptional activity                | [25] |
| Human villous     |                        |          |                                                   |    |                                         |      |
| trophoblast cell  | Baicalein (0, 5, 10,   |          | $\downarrow$ inflammatory responses;              |    | $\downarrow$ NF- $\kappa$ B signaling   |      |
| lines HTR8        | 20, 50, and 100        |          | $\downarrow$ apoptosis; mitochondrial             |    | though miR-17-5p-                       |      |
|                   | $\mu$ M)               | 48 hours | fission ( $\downarrow$ p-Drp1, $\uparrow$ Mfn1/2) | NA | Mfn1/2 pathway                          | [26] |

|                                                    |                                            |                                               |                                                            |                                                                                                                                        |                                                         |      |
|----------------------------------------------------|--------------------------------------------|-----------------------------------------------|------------------------------------------------------------|----------------------------------------------------------------------------------------------------------------------------------------|---------------------------------------------------------|------|
| cultured in high glucose (HG; 25 mmol/L)           |                                            |                                               |                                                            |                                                                                                                                        |                                                         |      |
| STZ-induced mouse diabetic model                   | Baicalin (40 mg/kg) by intragastric gavage | For 10 days                                   | ↓hyperglycemia                                             | NA                                                                                                                                     |                                                         |      |
| Chick embryos cultured in high glucose (HG; 50 mM) | Baicalin (3, 6, 12 and 24 μM)              | 26, 39 and 48 hours                           | NA                                                         | ↑embryo development;<br>↓malformation of cardiovascular system;<br>↑cell proliferative;<br>↓apoptosis increase;<br>↓oxidative stresses | NA                                                      | [27] |
| HFHS diet-induced mouse GDM model                  | Procyanidins (27.8 mg/kg) by orally gavage | 4 weeks before pregnancy and during pregnancy | ↓insulin resistance;<br>↓inflammation;<br>↑glycometabolism | NA                                                                                                                                     | ↓NF-κB p65 nuclear translocation and NLRP3 inflammasome | [28] |

---

activation

---

Fertilized eggs

cultured in high

Proanthocyanidins

glucose (HG; 0.2

(1 and 10

From EDD0 to

↓eye malformation;

mmol/egg)

nmol/egg)

EDD3.5

NA

↓oxidative stress

↑Pax6

[29]

---

Human visceral

(omental) adipose

tissue from

pregnant women

Protocatechuic acid

↑glucose uptake; ↑adiponectin

↑p38 MAPK

with GDM

(100 μM)

1 or 18 hours

release

NA

activation

[30]

---

↑oocyte maturation; ↑spindle

morphology and chromosome

alignment; ↑mitochondrial

function; ↓ROS; ↓DNA

Oocytes from

Tea polyphenols (0,

diabetic mice

25, 50 or 150 μM)

16 hours

damage

NA

NA

[31]

---

|                                                       |                                     |                                |                                                                                                              |                                                   |                                                       |      |
|-------------------------------------------------------|-------------------------------------|--------------------------------|--------------------------------------------------------------------------------------------------------------|---------------------------------------------------|-------------------------------------------------------|------|
|                                                       |                                     |                                | ↑oocyte maturation; ↑spindle morphology and chromosome alignment; ↑mitochondrial function; ↓ROS; ↓DNA damage | NA                                                | NA                                                    | [32] |
| STZ-induced                                           |                                     |                                |                                                                                                              |                                                   |                                                       |      |
| mouse model of diabetic embryopathy                   | EGCG (1 or 10 μM) in drinking water | From E3.5 to E8.75 or E10.5    | NA                                                                                                           | ↓NTD rate; ↓DNA methylation                       | ↓methylation in CpG islands of Grhl3, Pax3, and Tulp3 | [33] |
| Whole-conceptus                                       |                                     |                                |                                                                                                              |                                                   |                                                       |      |
| culture of rat embryo in high glucose (HG; 500 mg/dl) | EGCG (1, 10 mM)                     | 48 hours                       | NA                                                                                                           | ↓embryonic vasculopathy; ↓embryonic malformations | ↑Foxo3a and Akt activation                            | [34] |
| STZ combined with HFD diet-                           | Puerarin (0.25g/kg/day) by          | Pregnancy until offspring were | ↓pathological changes of pancreatic and liver tissues;                                                       | NA                                                | ↓TLR4/MyD88/NF-κB signaling                           | [35] |

|                       |                                                                           |                                   |                                                                                                                              |                           |                                      |      |
|-----------------------|---------------------------------------------------------------------------|-----------------------------------|------------------------------------------------------------------------------------------------------------------------------|---------------------------|--------------------------------------|------|
| induced rat GDM model | intragastrically administration                                           | born                              | ↓glucose and lipid metabolism disorders; ↓insulin resistance; ↓inflammatory mediators                                        |                           | pathway                              |      |
|                       | Calycosin (15 mg/kg or 30 mg/kg) by intragastric administration           | From the day of pregnancy to GD18 | ↓glucose intolerance; ↓insulin resistance; ↓inflammation; ↑pancreatic β cells function                                       | NA                        | ↓RNF38/SHP-1/STAT3 signaling pathway | [36] |
|                       |                                                                           |                                   | ↑body weight; ↓insulin resistance; ↓blood glucose; ↓FINS; biochemical criterion                                              |                           |                                      |      |
|                       | Pomegranate ellagic polyphenols (50, 150, 300 mg/kg/day) by orally gavage | 14 days from GD0 to GD14          | (↓RBP4, Hcy, GA, FFA and ↑11β-HSD2); ↓pathological damage of placenta and pancreatic tissues; ↓apoptosis; ↓APN and Chemerin; | ↑weight of the fetal rats | ↑PPAR signal pathway                 | [37] |

↓inflammation-associated  
proteins

|                 |                     |                  |                   |  |                          |         |
|-----------------|---------------------|------------------|-------------------|--|--------------------------|---------|
|                 | <i>Ganoderma</i>    | From gestational |                   |  |                          |         |
|                 | <i>lucidum</i> (100 | day GD1 to       |                   |  | ↑fetal head, thorax,     |         |
| STZ-induced rat | mg/kg/day) by oral  | GD19 or GD9 to   | ↓glycemia; ↓lipid |  | craniocaudal and tail in |         |
| GDM model       | administration      | GD19             | peroxidation      |  | fetuses                  | NA [38] |

GDM, gestational diabetes mellitus; STZ, streptozotocin; db/+, C57BL/KsJ-Lep<sup>db/+</sup>; db/+, B6.BKS(D)-Lep<sup>db/+</sup>/J; HFD, high-fat diet; GD, gestational day; E, embryonic day; EDD, embryo development day; i.p., intraperitoneal injection; HUVEC, human umbilical vein endothelial cell; VAT, visceral adipose tissue; Q3M, 3-O-methylquercetin; Q3G, quercetin-3-glucoside; HFHS, high-fat-high-sucrose diet; EGCG, epigallocatechin gallate; EGCG, epigallocatechin-3-gallate

## References

- [1] Tran, H.T., Liong, S., Lim, R., Barker, G., and Lappas, M., Resveratrol ameliorates the chemical and microbial induction of inflammation and insulin resistance in human placenta, adipose tissue and skeletal muscle. *PLoS One*, (2017). 12(3): e0173373.
- [2] Zhang, G., Wang, X., Ren, B., Zhao, Q., and Zhang, F., The Effect of Resveratrol on Blood Glucose and Blood Lipids in Rats with Gestational Diabetes Mellitus. *Evid Based Complement Alternat Med*, (2021). 2021: 2956795.
- [3] Yao, L., Wan, J., Li, H., Ding, J., Wang, Y., Wang, X., and Li, M., Resveratrol relieves gestational diabetes mellitus in mice through activating AMPK. *Reprod Biol Endocrinol*, (2015). 13: 118.

- [4] Zheng, T. and Chen, H., Resveratrol ameliorates the glucose uptake and lipid metabolism in gestational diabetes mellitus mice and insulin-resistant adipocytes via miR-23a-3p/NOV axis. *Mol Immunol*, (2021). 137: 163-173.
- [5] Du, S., Lv, Y., Li, N., Huang, X., Liu, X., Li, H., Wang, C., and Jia, Y.F., Biological investigations on therapeutic effect of chitosan encapsulated nano resveratrol against gestational diabetes mellitus rats induced by streptozotocin. *Drug Deliv*, (2020). 27(1): 953-963.
- [6] Singh, C.K., Kumar, A., Hitchcock, D.B., Fan, D., Goodwin, R., LaVoie, H.A., Nagarkatti, P., DiPette, D.J., and Singh, U.S., Resveratrol prevents embryonic oxidative stress and apoptosis associated with diabetic embryopathy and improves glucose and lipid profile of diabetic dam. *Mol Nutr Food Res*, (2011). 55(8): 1186-96.
- [7] Singh, C.K., Kumar, A., LaVoie, H.A., DiPette, D.J., and Singh, U.S., Resveratrol prevents impairment in activation of retinoic acid receptors and MAP kinases in the embryos of a rodent model of diabetic embryopathy. *Reprod Sci*, (2012). 19(9): 949-61.
- [8] Trejo-González, N.L., Chirino-Galindo, G., and Palomar-Morales, M., [Antiteratogenic capacity of resveratrol in streptozotocin-induced diabetes in rats]. *Rev Peru Med Exp Salud Publica*, (2015). 32(3): 457-63.
- [9] Tan, R.R., Zhang, S.J., Tsoi, B., Huang, W.S., Zhuang, X.J., Chen, X.Y., Yao, N., Mao, Z.F., Tang, L.P., Wang, Q., Kurihara, H., Li, Y.F., and He, R.R., A natural product, resveratrol, protects against high-glucose-induced developmental damage in chicken embryo. *J Asian Nat Prod Res*, (2015). 17(5): 586-94.
- [10] Lu, X., Wu, F., Jiang, M., Sun, X., and Tian, G., Curcumin ameliorates gestational diabetes in mice partly through activating AMPK. *Pharm Biol*, (2019). 57(1): 250-254.
- [11] Wu, Y., Wang, F., Reece, E.A., and Yang, P., Curcumin ameliorates high glucose-induced neural tube defects by suppressing cellular stress and apoptosis. *Am J Obstet Gynecol*, (2015). 212(6): 802.e1-8.
- [12] Zhong, J., Reece, E.A., and Yang, P., Punicalagin exerts protective effect against high glucose-induced cellular stress and neural tube defects. *Biochem Biophys Res Commun*, (2015). 467(2): 179-84.
- [13] Zhang, Z., Zhao, H., and Wang, A., Oleuropein alleviates gestational diabetes mellitus by activating AMPK signaling. *Endocr Connect*, (2021). 10(1): 45-53.
- [14] Xing, B.H., Yang, F.Z., and Wu, X.H., Naringenin enhances the efficacy of human embryonic stem cell-derived pancreatic endoderm in treating gestational diabetes mellitus mice. *J Pharmacol Sci*, (2016). 131(2): 93-100.
- [15] Li, S., Zhang, Y., Sun, Y., Zhang, G., Bai, J., Guo, J., Su, X., Du, H., Cao, X., Yang, J., and Wang, T., Naringenin improves insulin sensitivity in gestational diabetes mellitus mice through AMPK. *Nutr Diabetes*, (2019). 9(1): 28.
- [16] Zhao, C., Zhao, C., and Zhao, H., Defective insulin receptor signaling in patients with gestational diabetes is related to dysregulated miR-140 which can be improved by naringenin. *Int J Biochem Cell Biol*, (2020). 128: 105824.
- [17] Nguyen-Ngo, C., Willcox, J.C., and Lappas, M., Anti-Diabetic, Anti-Inflammatory, and Anti-Oxidant Effects of Naringenin in an In Vitro Human Model and an In Vivo Murine Model of Gestational Diabetes Mellitus. *Mol Nutr Food Res*, (2019). 63(19): e1900224.
- [18] Mahabady, M.K., Shamsi, M.M., Ranjbar, R., Tabandeh, M.R., and Khazaeel, K., Quercetin improved histological structure and upregulated adiponectin and adiponectin receptors in the placenta of rats with gestational diabetes mellitus. *Placenta*, (2021). 106: 49-57.

- [19] Liang, C., DeCourcy, K., and Prater, M.R., High-saturated-fat diet induces gestational diabetes and placental vasculopathy in C57BL/6 mice. *Metabolism*, (2010). 59(7): 943-50.
- [20] Bolouki, A., Zal, F., and Alaei, S., Ameliorative effects of quercetin on the preimplantation embryos development in diabetic pregnant mice. *J Obstet Gynaecol Res*, (2020). 46(5): 736-744.
- [21] Cao, L., Tan, C., Meng, F., Liu, P., Reece, E.A., and Zhao, Z., Amelioration of intracellular stress and reduction of neural tube defects in embryos of diabetic mice by phytochemical quercetin. *Sci Rep*, (2016). 6: 21491.
- [22] Tan, C., Meng, F., Reece, E.A., and Zhao, Z., Modulation of nuclear factor- $\kappa$ B signaling and reduction of neural tube defects by quercetin-3-glucoside in embryos of diabetic mice. *Am J Obstet Gynecol*, (2018). 219(2): 197.e1-197.e8.
- [23] Nguyen-Ngo, C., Salomon, C., Quak, S., Lai, A., Willcox, J.C., and Lappas, M., Nobiletin exerts anti-diabetic and anti-inflammatory effects in an in vitro human model and in vivo murine model of gestational diabetes. *Clin Sci (Lond)*, (2020). 134(6): 571-592.
- [24] Lim, R., Barker, G., Wall, C.A., and Lappas, M., Dietary phytochemicals curcumin, naringenin and apigenin reduce infection-induced inflammatory and contractile pathways in human placenta, foetal membranes and myometrium. *Mol Hum Reprod*, (2013). 19(7): 451-62.
- [25] Wijesuriya, Y.K. and Lappas, M., Potent anti-inflammatory effects of honokiol in human fetal membranes and myometrium. *Phytomedicine*, (2018). 49: 11-22.
- [26] Li, J., Wang, Y., Wu, T., Li, S., Sun, Y.N., and Liu, Z.H., Baicalein suppresses high glucose-induced inflammation and apoptosis in trophoblasts by targeting the miRNA-17-5p-Mfn1/2-NF- $\kappa$ B pathway. *Placenta*, (2022). 121: 126-136.
- [27] Wang, G., Liang, J., Gao, L.R., Si, Z.P., Zhang, X.T., Liang, G., Yan, Y., Li, K., Cheng, X., Bao, Y., Chuai, M., Chen, L.G., Lu, D.X., and Yang, X., Baicalin administration attenuates hyperglycemia-induced malformation of cardiovascular system. *Cell Death Dis*, (2018). 9(2): 234.
- [28] Liu, Y., Sun, R., Lin, X., Wu, L., Chen, H., Shen, S., Li, Y., Wei, Y., and Deng, G., Procyanidins and its metabolites by gut microbiome improves insulin resistance in gestational diabetes mellitus mice model via regulating NF- $\kappa$ B and NLRP3 inflammasome pathway. *Biomed Pharmacother*, (2022). 151: 113078.
- [29] Tan, R.R., Zhang, S.J., Li, Y.F., Tsoi, B., Huang, W.S., Yao, N., Hong, M., Zhai, Y.J., Mao, Z.F., Tang, L.P., Kurihara, H., Wang, Q., and He, R.R., Proanthocyanidins Prevent High Glucose-Induced Eye Malformation by Restoring Pax6 Expression in Chick Embryo. *Nutrients*, (2015). 7(8): 6567-81.
- [30] Scazzocchio, B., Filardi, T., Vari, R., Brunelli, R., Galoppi, P., Morano, S., Masella, R., and Santangelo, C., Protocatechuic acid influences immune-metabolic changes in the adipose tissue of pregnant women with gestational diabetes mellitus. *Food Funct*, (2021). 12(16): 7490-7500.
- [31] Lu, J., Zhao, S.X., Zhang, M.Y., Ji, P.Y., Chao, S., Li, L.J., Yin, S., Zhao, L., Zhao, H., Sun, Q.Y., and Ge, Z.J., Tea polyphenols alleviate the adverse effects of diabetes on oocyte quality. *Food Funct*, (2022). 13(9): 5396-5405.
- [32] Chao, S., Li, L.J., Lu, J., Zhao, S.X., Zhao, M.H., Huang, G.A., Yin, S., Shen, W., Sun, Q.Y., Zhao, Y., Ge, Z.J., and Zhao, L., Epigallocatechin gallate improves the quality of diabetic oocytes. *Biomed Pharmacother*, (2023). 159: 114267.
- [33] Zhong, J., Xu, C., Reece, E.A., and Yang, P., The green tea polyphenol EGCG alleviates maternal diabetes-induced neural tube defects by inhibiting DNA hypermethylation. *Am J Obstet Gynecol*, (2016). 215(3): 368.e1-368.e10.



- [34] Yang, P. and Li, H., Epigallocatechin-3-gallate ameliorates hyperglycemia-induced embryonic vasculopathy and malformation by inhibition of Foxo3a activation. *Am J Obstet Gynecol*, (2010). 203(1): 75.e1-6.
- [35] Xu, W., Tang, M., Wang, J., and Wang, L., Anti-inflammatory activities of puerarin in high-fat diet-fed rats with streptozotocin-induced gestational diabetes mellitus. *Mol Biol Rep*, (2020). 47(10): 7537-7546.
- [36] Li, Y., Duan, B., Li, Y., Yu, S., and Wang, Y., The isoflavonoid calycosin inhibits inflammation and enhances beta cell function in gestational diabetes mellitus by suppressing RNF38 expression. *Immunopharmacol Immunotoxicol*, (2020). 42(4): 366-372.
- [37] Sun, Y.L., Zhou, F.M., and Wang, H.R., Mechanism of pomegranate ellagic polyphenols reducing insulin resistance on gestational diabetes mellitus rats. *Am J Transl Res*, (2019). 11(9): 5487-5500.
- [38] Viroel, F.J.M., Laurino, L.F., Caetano É, L.A., Jozala, A.F., Spim, S.R.V., Pickler, T.B., Sercundes, M.K., Gomes, M.C., Hataka, A., Grotto, D., and Gerenutti, M., Ganoderma lucidum Modulates Glucose, Lipid Peroxidation and Hepatic Metabolism in Streptozotocin-Induced Diabetic Pregnant Rats. *Antioxidants (Basel)*, (2022). 11(6).
